# Supplementary material for: Genome-Wide Identification and Analysis of the EPF Gene Family in Sorghum bicolor (L.) Moench
Source: MDPI journal article supplement (doi:10.3390/plants12223912), 2023-11-20
Supplement: s1 [file s1]

## S2. SbEPFs CDS sequences.

### Sobic.001G106500 (SbEPF1)

ATGGA ACTCCAGCTCTACTACTCCACATCCCTGCTGCTGCTCCTCCTCCTGC  
TACCCTCTTCCTCTTCCTCCCACGGCCTGCGCTCTGCCGACGGTACTAGAGC  
GCTGCATTACCGGCTCAAGGATCCGCATCCACCAAAGGTCGGCGAGGGGG  
CGGCGGAGTCGCTGATCGGGTCAAGGCCGCCGCGGTGCGACGGCAAGTGC  
GCGCCGTGCGGGCGGTGCGAGGCGGTGCAGGTGCCGGTGGCGCCGCGGG  
TCGACAGCCGCGCGGGCGAGGGCGACGCCGACGAGCCCCGGCGCCGCGG  
CCGCGACGGGCTGTTGTTGGGCAGCGTCGACGAGGAGAGCTACACCGACT  
ACAAGCCTCTCAACTGGAGGTGCCGGTGC GCGGACCGGCGAGCCCTGGAT  
CCGTGA

### Sobic.001G140400 (SbEPF2)

ATGGGCCATATTTTCCTCCTCCTGGTAGTCCTCCTGCTCACTTCCACGCGAG  
CCACCGCCGCCGTCCATGCCAGAGCTTCCGCCATTGAGGAGGCGAGCTTTG  
CAGGCATCAGGGGCGTGATCGGATCCCGGCCGCCGAGCTGCGCGGGGAGG  
TGCAGGTCTGTGGCCACTGCGAGGCAGTGCAGGTGCCCGTATCTCCGCA  
GCAGCTGCAGAGGAAGAAGAAGGAGGGTCTCGGCCATAGCAGCAGAGCT  
GCTGCTGCTGCTGCTACCACCGGTGGAAGAGCAATGCCGGCCTCCTACGAC  
GACCACTCCA ACTATAAGCCGCTGAGCTGGAGATGCAAATGTGGGCGGCA  
CATCCTCGACCCTTGA

### Sobic.001G496400 (SbEPF3)

ATGGGCTGGCCGCCGAGCTGCGGGCTTGGGCCGGCGACGACGGGGCCTATC  
GGCCACGCTGCCGCTCTTCGTCGTCGTCCTCCTCCTCCTGCTGCTCTTCTTC  
TCCACCCCCGGGACGTGTGGCACGCCGGCGAAGGGGAGCGGCGGGCTTGGT  
GGCGCCGCCGACGACGACGACGAGGAGGAGGACGGGTACTCCTGGTCC  
TGGGACCCGGCGGCGGCGCGCCGGGGGCTGGTGGGGCCGGGGTCGTCGC  
CGCCACCTGCCGACGCCGCTGCGGGGGCTGCCACCCCTGCCGACCCGTC  
CACGTCGCCATCCAGCCAGGCCGGAGCTTCCCGCTCGAGTACTACCCGGA  
GGCCTGGCGCTGCAAGTGCGGCAACAAGCTCTTCATGCCCTGA

### Sobic.002G025300 (SbEPF4)

ATGGTCCATCTGTTGCAATGCAGACGATGCAGCGGCAGTGTTCAAACTC  
TTCCTCTTCTCTATCCTCCTCCTCACATCTTCCATGGCGGTAGCATTCTC  
AGATGCCTCAGATAACCAGGAGGTTGCCGCTGATGCTACAGCCGGAAGACA  
AGGAGGCAGTGGCCGCTGATGACAAGCAGCCGCTGGAGGCGGGAGGAGG  
AAGAAGAAGCAGATCAGGGGAGACTACGGAAGCAAGGCGGCGGCGTGGT  
CTGATCGGATCGAGGCCCCCGAGATGCGAGCGGGTGTGCATGTCCTGCGGC  
CACTGCGAGGCGGTGCAGGTGCCCATCGTGCCACAGCATGAGGAGGAGAA  
GGCGAGAGCCTCGGCGTCGGCGGTACCCCTCGCCGCCGCCATGTTACCTA  
CCGGGTGGACGGCATCAGCAACTACAAGCCGCTGAGCTGGAAGTGCAGGT  
GTGGAGGAACCATCCTGGATCCATGA

Sobic.003G339600 (SbEPF5)

ATGGAGTGCTCCCGGGGGAGGCGGAGATGGAGGTGGTGTGGCAGATCCAT  
GCTAAAGCTGGCGGGGCTATGCTGCTTCGCCGTGGCCATCGTCATCTGCTT  
CTGCGGCGTTCGGTCCTGGGCTTGCAAGTGCCAGCGCCTGCAGGGGGAGGA  
GTACTGTGTTGCTCCGTTTCAGAACCATGGGGACGAGGACGAGCGGCAGCA  
TCTTGCGATAACCAGGGGTGCTACATCAACACGGGCGTGCAAGGGCAAGG  
GCAATGGCGGGCGGCTGCTGGCGGAAGGTCCGGGGTCATACCCGCCACGGT  
GCACGTCCAAGTGCGGCGACTGCAGCCCGTGCTACCCGGTGCACGTGGCC  
GTGCCGCCGGGCGTGCCGGTCACCACCGAGTACTACCCGGAGGCGTGAG  
GTGCAAGTGCGGCAACCGCCTCTACATGCCATGA

Sobic.003G399800 (SbEPF6)

ATGGCTAATGGTTGCCCCACAACCTACCACAAGCTCCCTGCTCCTCTTCTTCC  
TTCTCTCTTGCCCTGCTCATCGGCCATGCTCTCTGCAGCCAAGGCCACAATG  
GCAGAACATCAGGTGCTGATTCTGTGGTGCAATATCCCCACCAGGAATTGC  
CTGCTAAACATATAGTTTTGCAGGAGGCCGTCAAGGGTCTAAACAAGGGCA  
TACTATCGAAGTATACAAGGAGAATGTTGATCGGCTCAATTGCTCCAATATG  
CACATACAACGAGTGCAGGGGGTGTCGATTCAAGTGTACTGCTGAGCAAG  
TCCCAGTGGATGCAAATGACCCCATGAACAGTGCTTACCACTACAAGTGTG  
TTTGCCACAGGTGA

Sobic.004G229700 (SbEPF7)

ATGGCCGTGAGCTGCTCACCTCGCCGAGCCCTCATCGCCGCCGTGTCCCTC  
TGCTTCCTTCTCGGCGCCGCGACCAGCATCCGCACCGCCACGTTTTCCCT  
TCTCAGAACCTGGCGGAGGACAAGTCGCGGCTGGGGTCGACGCCGCCGA  
GCTGCCACAACCGGTGCAGCGCCTGCAACCCCTGCATGCCCGTCCAGGTG  
ACGACCGCGCCGGGGCTCGGCCGCGCGGGCGCGCTCGCCGACGACACGG  
TGACGGTTGCCGGCTTCTCGCGCTACTCCAACCTACAAGCCGCTGGGGTGGA  
AATGCCGCTGCGACGGCCGCCTGTACGACCCCTAG

Sobic.005G166500 (SbEPF8)

ATGATGGGCGCCGTGACCTGCCGGAGCCGGACGAGCCGGCGCCGCTGCCA  
CGCCGCCACCGCCCTCCTCGCCGCCGTCTCTTCGCCGCGGCCATGGTTGT  
GGCAACAGGGCGGCCGGTCCGTTTGCCAGCGGCGGCGCTGGCGAGGAGG  
CGGATAGACTCGTCGTCGACGGCGATGATCATGAACGCCGGCGGCAGGGC  
AGCGACCACCACACGAGGTGGACAGCAGGCGCCGCCATGGACGACGTC  
CTCCCAGCAGCAGCCCGGCGGGCGGTGGCTGGTGGGTCCGGGGTCGTCGCC  
GCCGACGTGCCGCGCGCGGTGCGGGCGGTGCACGCCGTGCCGGCCCCACCC  
GCGTGGCCATCCAGCCCGGCGTCGGACCCAGTGGGAGTACTACCCGGAG  
GTGTGGCGCTGCAAGTGCGGCAACAAGCTCTTCATGCCATGA

Sobic.006G104400 (SbEPF9)

ATGAGAATGCGGGAGTCCTCTGCTTGCCGGTGCCGGCCGAGGATATGGTGG

TGGTCTCCAGCCCCAGCAGCAGCGGTCTGTGTTGGTGCTCCTGCTGCTCATC  
ACCACTTCGTCGTCAACGCACGTTGCCGACGGCGGCGTCAGGACGACACC  
ACGTGCGTACGGTCCAGGTGACGCCGGCGTGCTCGACGACGCGGAGGCAC  
CGGCTGCTGCTGGTGGTGGTCTCGTCGCGCAAGCAGCAGGGCAACCTACAAA  
TTTCCAGCAGACCGGACTAGCGAGGACGAAGGCTCGCTGGTGGTGGTGGGA  
GGAGGATCGGCGGTGGTGGCTGAAGGATCGCGCGGCGACGGGGTCGCGG  
CTGCCGACTGCGCGCACGCGTGCGGGCCGTGCTCCCCGTGCCGGCGCGT  
CATCGTGAGCTTCAGGTGCGCGCTGATGGCCTCCGAGTCCTGCCCCATCGC  
CTACCGCTGCATGTGCCGCGGCAGGTTCTTTCGGGTGCCCTCCCCCTAG

Sobic.006G233600 (SbEPF10)

ATGCTGGCTATAGCTGCGGCTATATATATGTGTACGCTCGGCGCGGAGACGA  
CGTACGTGCAGGTGCAGCTAGCCCCGGCCTCGCCTCGCGCAACATTGGAGC  
AACC CGCGCTTCGTTGCCTCCCGGGCTCTCGCTCTCAGTGCTCCGCCGCC  
GCCACGCCGCGACGACGTCTCAGCAGCCAGCACTGCGAAGCGTACGCGGT  
CTCTCTTGGGCTGATGGGGAGGCACGCTGGCGTCGTCCTTCTTGCTCTGAC  
GGTAGTGCTGCTGCTCGCCGCCGTGGGTGATGGCATCAGACCAGCTCCTAC  
TGCTGGGGCGAGCGAGATGGTGCATGGATCGACGACGACGACGACGGAGA  
TGGTCGTCGTAGCTGCGCCGTCAGCTGCACAGGTGCAGGGGAAGAGGAGC  
AGGGGCGGCAAGGACGACGACCTGGTGCTGCGGGAGGAGGTGGTGCGCG  
CGACGGGGTCGAGCCTCCCGGACTGCTCGCACGCGTGCGGGGCGTGCTCG  
CCGTGCAGCCGCGTCATGGTCAGCTTCAAGTGCTCCGCGTCCGAGCCGCTG  
CCGTGCCCCATGGTGTACCGCTGCATGTGCAGGGGCAAGTGCTACCCGGTG  
CCATCCAGCTGA

Sobic.007G197500 (SbEPF11)

ATGGCAGCAGCATATGGAAGCACCAAGGCAGCAGCAGCAGTTGCGTCGTTG  
TGTGGCGCTGTGCTGTCTCCTCCTCGTGGCTGTCCTAGTGATTATTGGTTAT  
GCCGTGTTAGCTGATGCTCGAGCAGGCTCGCCGCGGACTGACGAAGTAGC  
ACTTCAGACAGGGCAGCTGCAGGGATTTAGTAGGAGATCGAGTACTGAAG  
CACTGACGACGACGACGACGACGCGCTGCAGCTGGTGGTTGGACGGCGTTG  
GACACGGAGCAGCAGGCGGCTGCCGGCGGCGGGCGGGAGGAGGAGGATGC  
TGGTCGGGTCCAGGGCTCCGACGTGCACCTACAACGAGTGCCGAGGCTGC  
CGGCACAGGTGCAGCGTGAGGAGGTGCCCATCGACGCCAGCGACCCCAT  
CAACAGCGCCTACCACTACAAATGCATCTGCCATCTATAG

Sobic.009G173200 (SbEPF12)

ATGGTGGTTTCAGGTGATGCCGCCGCCGCTGCTCATGGTGGGGAGGCAGCA  
GCCGAGGTGGTGGTGGTGGAGGGGGAGCTCCGGATCCGCGCGGTTCGACG  
ACGCTCGGCGGCGTCGCGGTGGTGGTTGCGCTGCTCGTCTCCCTCTGCTTC  
ATCGGCAGCCGTTTCACGGGGACACAGCTGGGTGGCTGCAGTACCCTCGC  
AGCACTCGCTTCATCAGATTCCGGGAGGACGACCGTGGCAGCGGCAGCAG  
GAGCAGCCCATCCCGGCGGTTCAGGTGGTGGCGACTGATGAGACGCAGGAG  
GAGCGGGTTTATTACATCATCGCGCGACGACGACGCCGGCTGCTGTCGGGC

GGGCTGGGGTCGCATCCGCCACGGTGCACCACCAAATGCGGCAGCTGCAA  
CCCGTGCTACCCGGTGCACGTGTCCGTGCCGCCGGGGGTTCTGGTCACCAC  
CGAGTACTACCCGGAGGCGTGGCGGTGCAAGTGCCGGAACCAGCTCTACA  
TGCCATGA
