# Supplementary material for: Genome-Wide Identification and Analysis of the EPF Gene Family in Sorghum bicolor (L.) Moench
Source: MDPI journal article supplement (doi:10.3390/plants12223912), 2023-11-20
Supplement: s1 [file s1]

Table S1. List of all primers used in this study.

| Name                 | Sequence (from 5' to 3') |
|----------------------|--------------------------|
| $\beta$ -SbActin1-qF | ATCGAGCACGGAATCGTCAG     |
| $\beta$ -SbActin1-qR | GACCGCTGGCATAACAGAGAG    |
| SbEIF4a-qF           | AGGATTGGCACCAGAAGGGT     |
| SbEIF4a-qR           | CACATCAAGCCCCTTGCAGA     |
| SbEPF1-qF            | GGAGTCGCTGATCGGGTCAA     |
| SbEPF1-qR            | GTTGAGAGGCTTGTAGTCGGT    |
| SbEPF2-qF            | AGAAGAAGGAGGGTCTCGGC     |
| SbEPF2-qR            | TCAAGGGTCGAGGATGTGCC     |
| SbEPF3-qF            | GACGGGTACTCCTGGTCCT      |
| SbEPF3-qR            | GTAGTACTCGAGCGGGAAGC     |
| SbEPF4-qF            | AGGGGAGACTACGGAAGCAA     |
| SbEPF4-qR            | CGGCTTGTAGTTGCTGATGC     |
| SbEPF5-qF            | CCAGGGGTGCTACATCAACA     |
| SbEPF5-qR            | ATGGCATGTAGAGGCGGTTG     |
| SbEPF6-qF            | GGCCGTCAAGGGTCTAAACA     |
| SbEPF6-qR            | TCACCTGTGGCAAACACACT     |
| SbEPF7-qF            | CAGAACCTGGCGGAGGACAA     |
| SbEPF7-qR            | CGGCTTGTAGTTGGAGTAGCG    |
| SbEPF8-qF            | CACGAGGTGGACAGCAGG       |
| SbEPF8-qR            | CATGAAGAGCTTGTTGCCGC     |
| SbEPF9-qF            | GGTGGTGGCTGAAGGATCG      |
| SbEPF9-qR            | GAGGGCACCCGAAAGAACCT     |
| SbEPF10-qF           | TGCTGGCTATAGCTGCGG       |
| SbEPF10-qR           | GGAGCACTGAGAGCGAGAG      |
| SbEPF11-qF           | GCGGACTGACGAAGTAGCAC     |
| SbEPF11-qR           | TCGGCACTCGTTGTAGGTG      |
| SbEPF12-qF           | GCAGGAGGAGCGGGTTTATT     |
| SbEPF12-qR           | TGGCATGTAGAGCTGGTTCC     |
