# Supplementary material for: Genome-Wide Identification and Analysis of the EPF Gene Family in Sorghum bicolor (L.) Moench
Source: MDPI journal article supplement (doi:10.3390/plants12223912), 2023-11-20
Supplement: s1 [file s1]

S1. SbEPFs protein sequences.

Sobic.001G106500 (SbEPF1)

MELQLYYSTSLLLLLLLPSSSSSHGLRSADGTRALHYRLKDPHPPKVGEGAA  
ESLIGSRPPRCDGKCAPCGRCEAVQVPVAPRVDSRAGEGDADEPRRRGRDGL  
LLGSVDEESYTDYKPLNWRCRCADRRALDP\*

Sobic.001G140400 (SbEPF2)

MGHIFLLLVLLLTSTRATAAVHARASAIIEEASFAGIRGVIGSRPPSCAGRCRS  
CGHCEAVQVPVSPQQQLQRKKKEGLGHSSRAAAAAATTGGRAMPASYYDDHS  
NYKPLSWRCKCGRHILDP\*

Sobic.001G496400 (SbEPF3)

MGWPPSCGLGRRRRGLSATLPLFVVVLLLLLLFFSTPGTCGTPAKGSGGLVAP  
PTTTTEEDGYSSWDPAAARRGLVGPGSSPPTCRSRCGGCHPCRPHVAIQ  
PGRSFPLEYYPEAWRCKCGNKLFMP\*

Sobic.002G025300 (SbEPF4)

MVHLLQCRRCSGSVHKLFLFSILLLLTSSMAVAFSDASDTRRLPLMLQPEDKE  
AVAADDKQPLEAGGRRRSRGETTEARRRRGLIGSRPPRCERVCMSCGHCEA  
VQVPIVPQHEEEKARASASAVTLAAAMFTYRVDGISNYKPLSWKCRCGGTIL  
DP\*

Sobic.003G339600 (SbEPF5)

MECSRGRRRWRWCGRSMLKLAGLCCFAVAIVICFCGVRSWACSASACRGRS  
TVLLRSEPWGRGRAAAASCDNQGCYINTGVQGGQWRLLAEGPGSYPPRCT  
SKCGDCSPCYPVHVAVPPGVPVTTEYYPEAWRCKCGNRLYMP\*

Sobic.003G399800 (SbEPF6)

MANGCPTTTTSSLLLFLLSCLLIGHALCSQGHNGRTSGADSVVQYPHQELPA  
KHIVLQEAVKGLNKGILSKYTRMLIGSIAPICTYNECRGCRFKCTAEQVPVD  
ANDPMNSAYHYKCVCHR\*

Sobic.004G229700 (SbEPF7)

MAVSCSPRRALIAAVSLCFLPGAATSIRTATFSPSQNLAEDKSRLGSTPPSCHN  
RCSACNPCMPVQVTTAPGLGRAARVADDTVTVAGFSRYSNYKPLGWKCRC  
DGRLYDP\*

Sobic.005G166500 (SbEPF8)

MMGAVTCRSRTSRRRCHAATALLAAVLFAAAMVVATGRPVRPAAALARR  
RIDSSSTAMIMNAGGRAATTTTRWTAGAAMDVLPAAARRRWLVGPGSSPP  
TCRARCGRCTPCRPTRVAIQPGVGPQWEYYPEVWRCKCGNKLFMP\*

Sobic.006G104400 (SbEPF9)

MRMRESSACRCRPRIWWSPAPAAAVVLVLLLLITTSSSTHVADGGVRTTPR  
AYGPGDAGVLDDAEAPAAAGGARRASSRATYKFPADRTSEDEGSLVVVEED  
RRWWLKDRAATGSRLPDCAHACGPCSPCRRVIVSFRCALMADESCPIAYRCM  
CRGRFFRVPS\*

Sobic.006G233600 (SbEPF10)

MLAIAAAIYMCTLGAETTYVQVQLARPRLAQHWSNRALRCLPGSRSQCSAA  
ATPRRLSSQHCEAYAVSLGLMGRHAGVVLLALTVVLLAAVGDGIRPAPTA  
GASEMVHGSTTTTTEMVVVAAPSAAQVQGKRSRGGKDDDLVREEVVRAT  
GSSLPDCSHACGACSPCSRVMVSFKCSASEPLPCPMVYRCMCRGKCYPVPSS\*

Sobic.007G197500 (SbEPF11)

MAAAYGSTRQQQLRRCVALCCLLLVAVLVIIGYAVLADARAGSPRTDEVA  
LQTGQLQGFSRRSSTEALTTTTTTAAAGGWTALDTEQQAAAGGGGRRRMLV  
GSRAPTCTYNECRGCRHRCSVQEVPIDASDPINSAYHYKCICHL\*

Sobic.009G173200 (SbEPF12)

MVVQVMPPPLLMVGRQQPRWWWRGSSGSARSTTLGGVAVVVALLVSLC  
FIGSRFTGTQLGGCSTLAALASSDSGRRTVAAAAGAAHPGGQVVATDETQEE  
RVYYIIARRRRRLLSGGLGSHPPRCTTKCGSCNPCYPVHVSVPGLVTTEYY  
PEAWRCKCRNQLYMP\*
